# Supplementary material for: Benefits of Anthocyanin-Rich Black Rice Fraction and Wood Sterols to Control Plasma and Tissue Lipid Concentrations in Wistar Kyoto Rats Fed an Atherogenic Diet
Source: MDPI journal article supplement (doi:10.3390/molecules25225363), 2020-11-17
Supplement: s1 [file s1]

Table S1. Food intake during experiment, heart and liver, weight, hematocrit and hemoglobin in rats.

| Treatment   | Food intake<br>[g]  | Heart weight<br>[g]    | Liver weight<br>[g]     | Hematocrit<br>[%]      | Hemoglobin<br>mg/mL     |
|-------------|---------------------|------------------------|-------------------------|------------------------|-------------------------|
| NC          | 615±20              | 1.07±0.04              | 12.62±0.33              | 0.87±0.02 <sup>+</sup> | 11.5±0.25               |
| PCCh        | 416±25 <sup>a</sup> | 1.13±0.05 <sup>a</sup> | 19.99±0.85 <sup>a</sup> | 0.41±0.02 <sup>a</sup> | 11.7±0.270 <sup>a</sup> |
| PCCh+BRF    | 472±15 <sup>b</sup> | 1.10±0.04 <sup>a</sup> | 17.96±0.99 <sup>b</sup> | 0.38±0.01 <sup>a</sup> | 11.0±0.32 <sup>a</sup>  |
| PCCh+WS     | 445±21 <sup>a</sup> | 1.06±0.03 <sup>a</sup> | 13.55±0.45 <sup>c</sup> | 0.40±0.08 <sup>a</sup> | 11.1±0.33 <sup>a</sup>  |
| PCCh+WS+BRF | 414±17 <sup>b</sup> | 1.08±0.04 <sup>a</sup> | 13.72±0.55 <sup>c</sup> | 0.42±0.01 <sup>a</sup> | 11.2±0.25 <sup>a</sup>  |

NC- AIN-76A diet

PCCh positive control (0.5% cholesterol, 0.05 cholic acid, 3% butter)

BRF-black rice fraction

PCCh/PC+BRF positive control with black rice fraction

PCCh/PC+WS positive control with wood sterols,

PCCh/PC+WS+BRF positive control with wood sterols and black rice fraction

Data are expressed as means ± SEM (n=8). The symbol + signifies a significant difference (P<0.05) between the negative cholesterol (NC) and positive control group (PCCh); values in column with different letter (a, b, c) are significantly different at P≤0.05.
